# Supplementary material
Source: publisher site journal article supplement (https://www.dovepress.com/article/419991)
Supplement: Supplementary file 1 [file get_supplementary_file.php]

## Supplementary Material

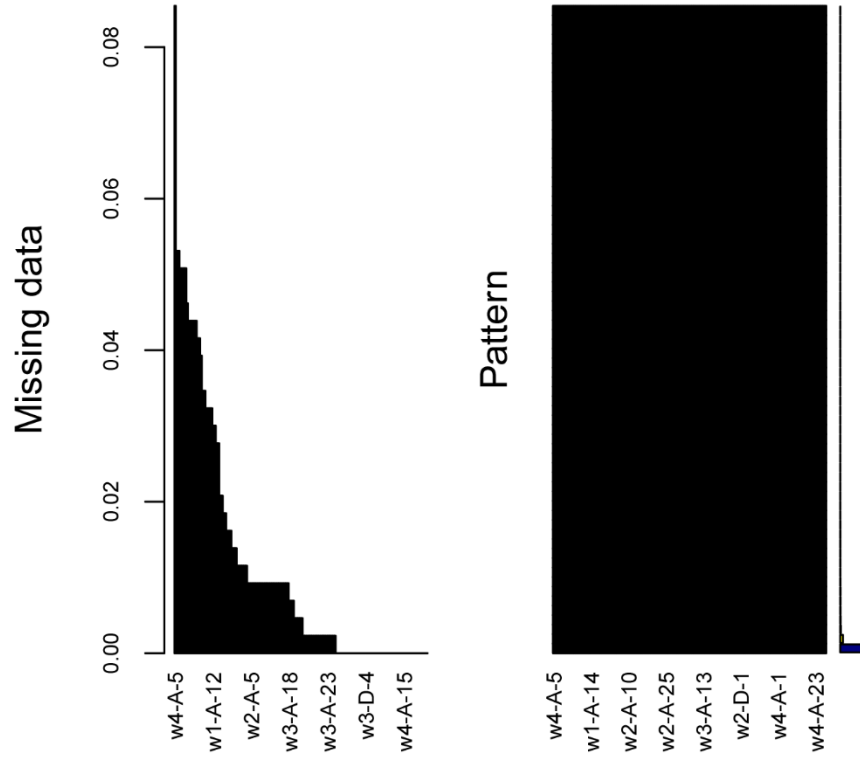

Figure S1. Missing data and interpolation situations

Note: w4-A-5, w4 represents the fourth wave of data and A-5 represents the fifth life event node.

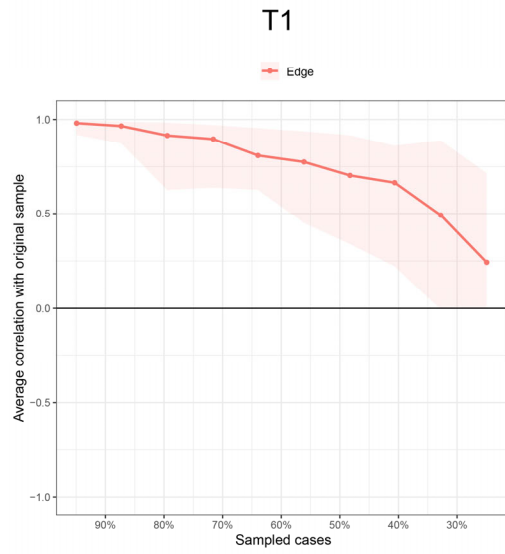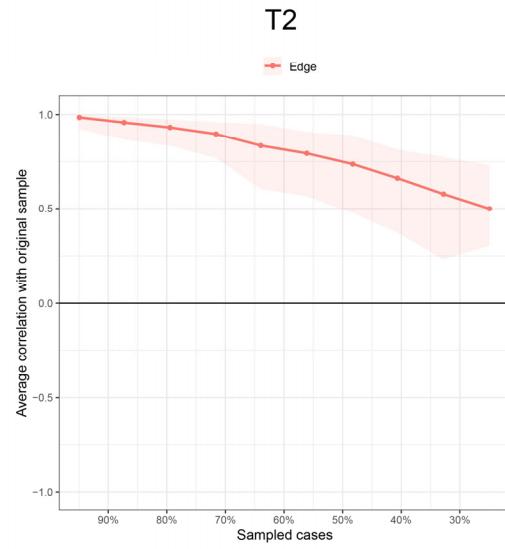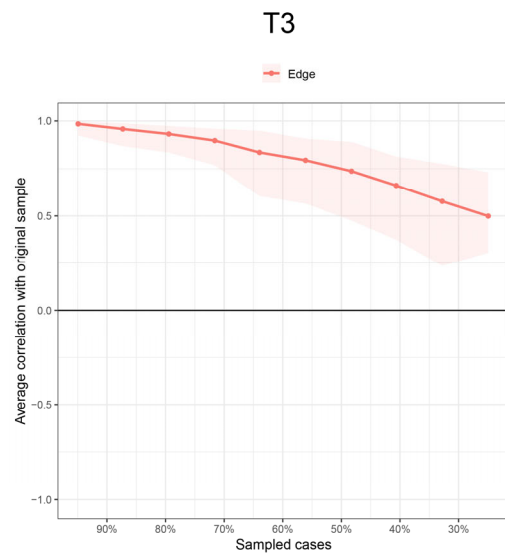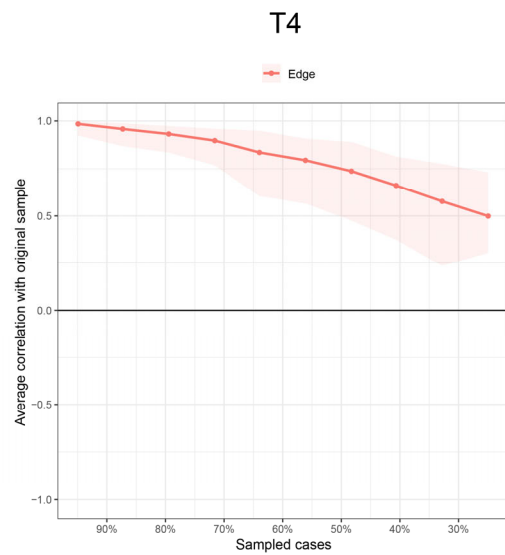

Figure S2. Stability of edge weights of T1 to T4 cross-sectional network

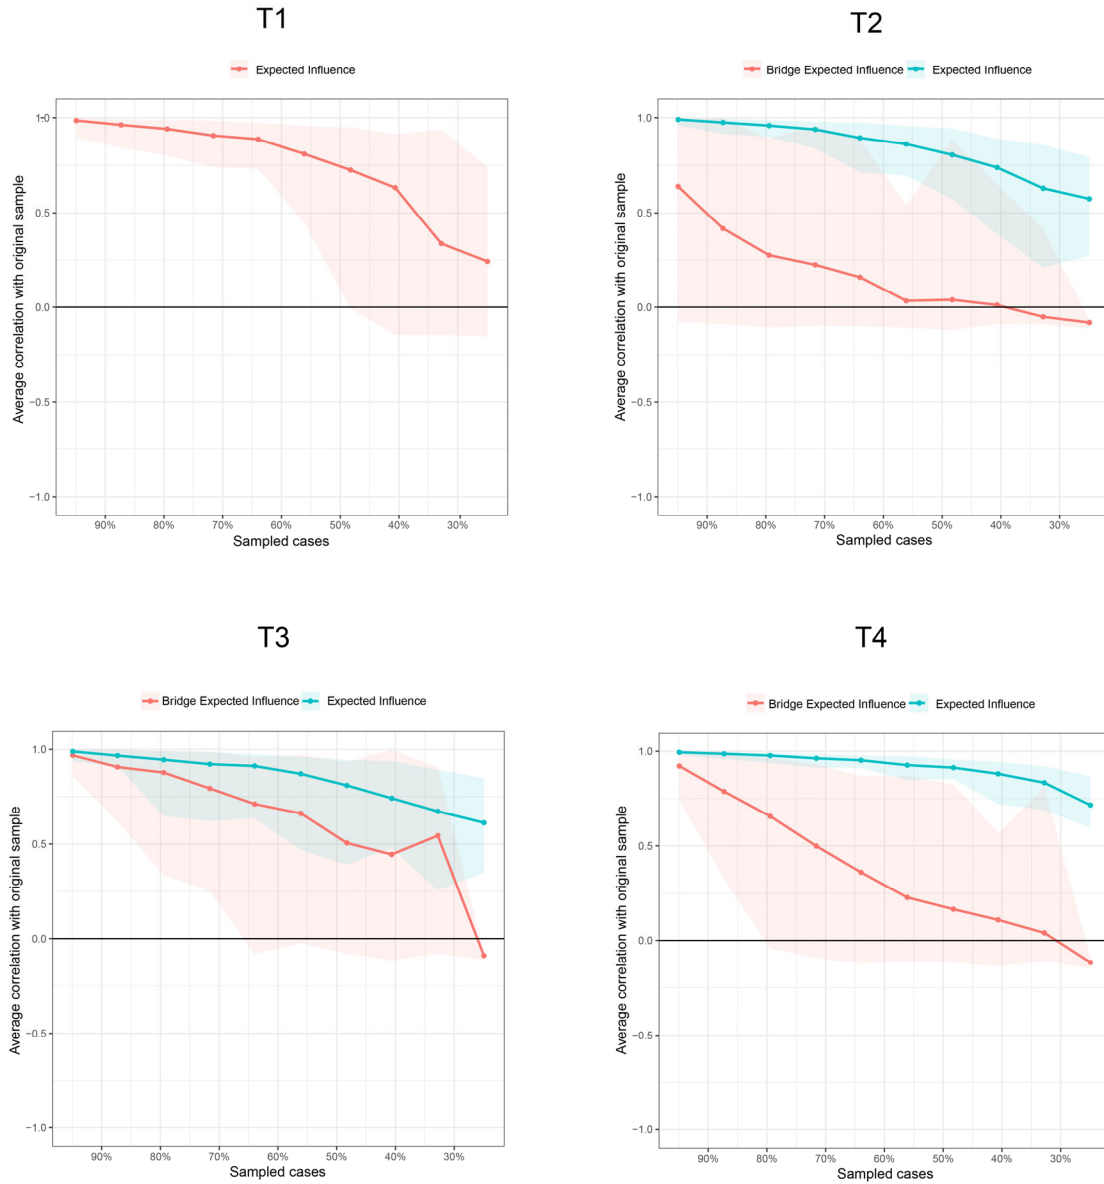

Figure S3. Stability of node expected influences and bridge expected influences of T1 to T4 cross-sectional network

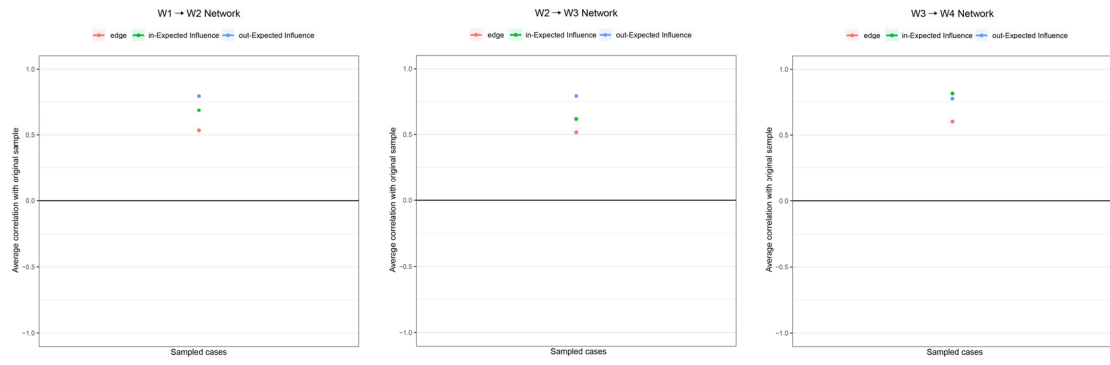

Figure S4. Stability of edge weights, in expected influence and out expected influence of Cross-lagged panel network

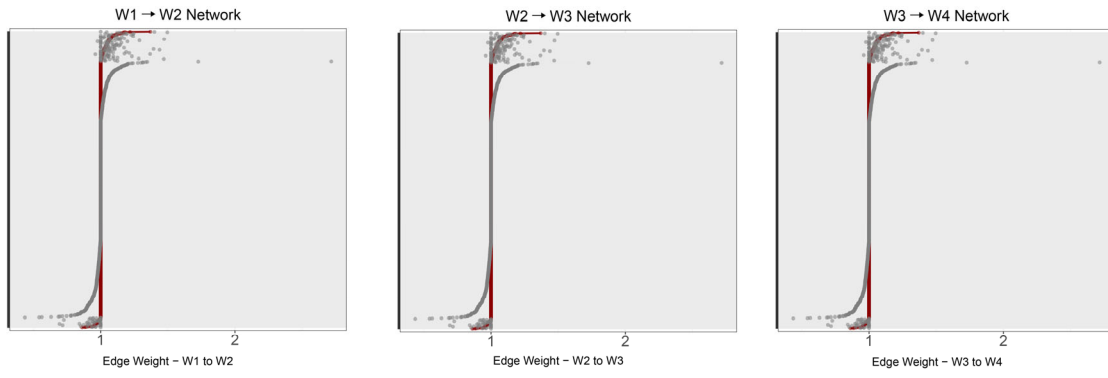

Figure S5. Accuracy of edge weights of Cross-lagged panel network

Table S1. In expected influence and out expected influence of Cross-lagged panel network

| Nodes  | T1→T2    |          | T2→T3    |          | T3→T4    |          |
|--------|----------|----------|----------|----------|----------|----------|
|        | InEI     | OutEI    | InEI     | OutEI    | InEI     | OutEI    |
| Age    | -0.74541 | -0.55945 | -0.90898 | -1.05389 | -0.79907 | -0.56039 |
| A-27   | 0.363856 | 0.036846 | 1.923409 | 0.276372 | -0.65074 | 0.36169  |
| A-26   | -0.74541 | -0.82117 | -0.90898 | -1.42864 | -0.79907 | -0.53993 |
| A-25   | -0.46908 | -0.49466 | 1.039473 | 0.222775 | -0.27671 | 0.292509 |
| A-24   | -0.74541 | 0.027494 | -0.90898 | 3.048653 | -0.79907 | -1.68074 |
| A-23   | -0.74541 | -0.7243  | -0.90898 | 3.325351 | -0.79907 | -1.02999 |
| A-22   | -0.74541 | -0.93116 | -0.02411 | -0.15949 | 0.759647 | -0.23816 |
| A-21   | -0.74541 | 0.081513 | -0.90898 | -0.59306 | -0.79907 | -0.60163 |
| A-20   | -0.74541 | 0.207656 | -0.90898 | -0.59306 | -0.79907 | 4.2396   |
| A-19   | -0.30466 | -0.6332  | -0.54144 | -0.48529 | -0.79907 | -0.55721 |
| A-18   | -0.74541 | 0.060635 | 0.679331 | 0.053991 | -0.62244 | -0.187   |
| A-17   | 0.32045  | -0.70841 | 1.453255 | -0.59402 | -0.25012 | 0.142649 |
| A-16   | -0.31648 | -0.41817 | 3.311345 | 0.316044 | -0.25089 | 0.337804 |
| A-15   | -0.15141 | 0.267688 | 0.672778 | -0.50338 | -0.37361 | -0.04083 |
| A-14   | -0.74541 | -0.55177 | 1.19393  | -0.59845 | -0.13177 | 0.499115 |
| A-13   | -0.43079 | -0.6652  | -0.64008 | -0.95648 | -0.60222 | -0.15738 |
| A-12   | -0.59236 | 0.965543 | -0.60642 | -0.26477 | -0.84921 | -0.6911  |
| A-11   | -0.74541 | -0.43666 | -0.81153 | 2.121925 | -0.79907 | 0.00498  |
| A-10   | -0.63035 | 0.436557 | -0.90898 | 0.965663 | -0.79907 | -0.87729 |
| A-9    | 3.143316 | -0.44593 | -0.52679 | -0.29436 | 0.093171 | -0.61175 |
| A-8    | 0.684002 | -0.57677 | -0.24665 | -0.51209 | -0.79907 | -0.61175 |
| A-7    | -0.66115 | -0.41707 | -0.73448 | 0.533218 | -0.57595 | -0.41268 |
| A-6    | 2.923434 | -0.85445 | -0.38282 | -0.38011 | -0.7468  | 0.171398 |
| A-5    | 0.296308 | -0.72199 | 0.218543 | -0.09986 | 1.775175 | -0.46124 |
| A-4    | 0.824826 | -1.06967 | 0.329527 | -0.04011 | -0.79388 | 0.184659 |
| A-3    | 0.83368  | -0.31515 | -0.34954 | -0.1559  | 2.168837 | -0.33945 |
| A-2    | 0.344021 | 2.941959 | 2.012805 | -0.31669 | -0.45934 | 0.603287 |
| A-1    | 0.587093 | -0.28928 | 0.34276  | -0.34838 | 0.616045 | -0.17135 |
| Gender | -0.74541 | -1.93589 | -0.90898 | -1.34319 | -0.79907 | -1.24609 |
| D-9    | -0.68355 | -0.35817 | -0.90898 | -0.6118  | 2.277681 | -1.19204 |
| D-8    | 0.444664 | -0.10771 | -0.39609 | -0.201   | 0.174108 | -0.27141 |
| D-7    | 2.249168 | 0.675863 | 0.210855 | 0.113126 | 2.537572 | 0.329187 |
| D-6    | -0.6948  | 1.629038 | 0.145406 | 0.261117 | 0.438059 | 1.598128 |
| D-5    | 0.477624 | 0.509665 | 0.935496 | 0.19257  | 0.310246 | 0.335792 |
| D-4    | 0.943732 | 1.982367 | -0.72061 | 1.053655 | 1.778219 | 0.60558  |
| D-3    | -0.51055 | 2.420543 | -0.6896  | -0.57813 | 0.795593 | -0.05306 |
| D-2    | -0.14475 | 0.387515 | 0.179843 | -0.31373 | 1.013459 | 1.350813 |
| D-1    | -0.64671 | 1.405355 | 0.202232 | -0.05857 | 0.635594 | 1.475263 |

Table S2. Edge weights value of Cross-lagged panel network

| Edge        | T1→T2       | T2→T3       | T3→T4       |
|-------------|-------------|-------------|-------------|
| D-2->D-1    | 1.183261346 | 1.041504035 | 1.030653186 |
| D-3->D-1    | 1           | 1           | 1           |
| D-4->D-1    | 1.095386566 | 1.14499951  | 1.062966325 |
| D-5->D-1    | 1           | 1.007284613 | 1           |
| D-6->D-1    | 1           | 1           | 1.030395152 |
| D-7->D-1    | 1           | 1.112632321 | 1.025498324 |
| D-8->D-1    | 1           | 1           | 1.017945463 |
| D-9->D-1    | 1           | 1           | 1           |
| A-1->D-1    | 1           | 1           | 1           |
| A-2->D-1    | 1.052767008 | 1           | 1.016718358 |
| A-3->D-1    | 1           | 1           | 1.006636008 |
| A-4->D-1    | 0.97337134  | 1.006626226 | 1           |
| A-5->D-1    | 0.964267839 | 1.011413663 | 1           |
| A-6->D-1    | 1           | 1           | 1.05125473  |
| A-7->D-1    | 1           | 1           | 1           |
| A-8->D-1    | 1           | 1           | 1           |
| A-9->D-1    | 1           | 1           | 1           |
| A-10->D-1   | 0.949321343 | 1           | 1           |
| A-11->D-1   | 1           | 1           | 1           |
| A-12->D-1   | 1           | 1.039181731 | 1           |
| A-13->D-1   | 1           | 1           | 1           |
| A-14->D-1   | 1.019085953 | 1           | 1           |
| A-15->D-1   | 1           | 1           | 1           |
| A-16->D-1   | 1           | 1           | 1           |
| A-17->D-1   | 1           | 1           | 1           |
| A-18->D-1   | 1           | 1           | 1           |
| A-19->D-1   | 0.981226462 | 1           | 1           |
| A-20->D-1   | 1           | 1           | 1           |
| A-21->D-1   | 1           | 1           | 1           |
| A-22->D-1   | 1           | 1           | 1           |
| A-23->D-1   | 0.96299639  | 1           | 1           |
| A-24->D-1   | 1           | 1           | 1           |
| A-25->D-1   | 0.982335915 | 1           | 1           |
| A-26->D-1   | 1           | 1           | 1           |
| A-27->D-1   | 1           | 1.00400591  | 1           |
| Age->D-1    | 0.995629518 | 0.971460519 | 0.998529001 |
| Gender->D-1 | 0.890252601 | 0.963261574 | 1           |
| D-1->D-2    | 1.061225754 | 1           | 1.161391359 |
| D-3->D-2    | 1.042155043 | 1           | 1           |
| D-4->D-2    | 1.006550407 | 1.115305661 | 1.077418456 |
| D-5->D-2    | 1           | 1           | 1           |

|             |             |             |             |
|-------------|-------------|-------------|-------------|
| D-6->D-2    | 1           | 1.008566393 | 1.021395376 |
| D-7->D-2    | 1           | 1.072687788 | 1           |
| D-8->D-2    | 1           | 1           | 1           |
| D-9->D-2    | 1           | 1           | 1           |
| A-1->D-2    | 1           | 1           | 1           |
| A-2->D-2    | 1.009746286 | 1           | 1           |
| A-3->D-2    | 1           | 1.013356091 | 1.011543019 |
| A-4->D-2    | 1           | 1.025641617 | 1           |
| A-5->D-2    | 1           | 1.044730824 | 1           |
| A-6->D-2    | 1           | 1.005630576 | 1.02809368  |
| A-7->D-2    | 1           | 1.016840061 | 1           |
| A-8->D-2    | 1           | 1           | 1           |
| A-9->D-2    | 1           | 1           | 1           |
| A-10->D-2   | 1           | 1           | 1           |
| A-11->D-2   | 1           | 1           | 1           |
| A-12->D-2   | 1           | 1           | 1           |
| A-13->D-2   | 1           | 1           | 1           |
| A-14->D-2   | 1           | 1           | 1           |
| A-15->D-2   | 1           | 1           | 1           |
| A-16->D-2   | 1           | 1           | 1           |
| A-17->D-2   | 1           | 1           | 1           |
| A-18->D-2   | 1           | 1           | 1           |
| A-19->D-2   | 1           | 1           | 1           |
| A-20->D-2   | 1           | 1           | 1           |
| A-21->D-2   | 1           | 1           | 1           |
| A-22->D-2   | 1           | 1           | 1           |
| A-23->D-2   | 1           | 1           | 1           |
| A-24->D-2   | 1           | 1           | 1           |
| A-25->D-2   | 1           | 1           | 1           |
| A-26->D-2   | 1           | 1           | 1           |
| A-27->D-2   | 1           | 1.008690866 | 1.013545809 |
| Age->D-2    | 1           | 0.977452615 | 1           |
| Gender->D-2 | 1           | 1           | 1           |
| D-1->D-3    | 1           | 1           | 1           |
| D-2->D-3    | 1           | 1           | 1           |
| D-4->D-3    | 1.0355594   | 1.057683207 | 1.003735759 |
| D-5->D-3    | 1           | 1           | 1.093044716 |
| D-6->D-3    | 1           | 1           | 1.017736051 |
| D-7->D-3    | 1           | 1           | 1.035899682 |
| D-8->D-3    | 1.010843293 | 1           | 1           |
| D-9->D-3    | 1           | 1           | 0.882833527 |
| A-1->D-3    | 1           | 1           | 1           |
| A-2->D-3    | 1           | 1           | 1.057931731 |



|             |             |             |             |
|-------------|-------------|-------------|-------------|
| A-3->D-3    | 1           | 1           | 1           |
| A-4->D-3    | 1           | 1           | 1.057422667 |
| A-5->D-3    | 1           | 1           | 1           |
| A-6->D-3    | 1           | 1           | 1           |
| A-7->D-3    | 1           | 1           | 1           |
| A-8->D-3    | 1           | 1           | 1           |
| A-9->D-3    | 1           | 1           | 1           |
| A-10->D-3   | 1           | 1           | 1           |
| A-11->D-3   | 1           | 1           | 0.978392769 |
| A-12->D-3   | 1           | 1           | 1           |
| A-13->D-3   | 1           | 1           | 1           |
| A-14->D-3   | 1           | 1           | 1.118491509 |
| A-15->D-3   | 1           | 1           | 1           |
| A-16->D-3   | 1           | 1           | 1           |
| A-17->D-3   | 1           | 1           | 1.028581118 |
| A-18->D-3   | 1           | 1           | 1           |
| A-19->D-3   | 1           | 1           | 1           |
| A-20->D-3   | 1           | 1           | 1           |
| A-21->D-3   | 1           | 1           | 1           |
| A-22->D-3   | 1           | 1           | 1           |
| A-23->D-3   | 1           | 1           | 1           |
| A-24->D-3   | 1           | 1           | 1           |
| A-25->D-3   | 1           | 1           | 1           |
| A-26->D-3   | 1           | 1           | 1           |
| A-27->D-3   | 1           | 1           | 1.02293887  |
| Age->D-3    | 1           | 1           | 0.988170506 |
| Gender->D-3 | 1           | 1           | 1           |
| D-1->D-4    | 1.095417899 | 1.005561501 | 1.122246004 |
| D-2->D-4    | 1.007006299 | 1           | 1           |
| D-3->D-4    | 1.090428613 | 1           | 1.020449813 |
| D-5->D-4    | 1           | 1.064482996 | 1.056948737 |
| D-6->D-4    | 1           | 1           | 1.044094457 |
| D-7->D-4    | 1           | 1           | 1.040824752 |
| D-8->D-4    | 1.036357418 | 1           | 1           |
| D-9->D-4    | 1           | 0.845487237 | 1           |
| A-1->D-4    | 1           | 1           | 1.023790498 |
| A-2->D-4    | 1.08313838  | 1           | 1           |
| A-3->D-4    | 0.998294084 | 1           | 1           |
| A-4->D-4    | 1           | 1           | 1           |
| A-5->D-4    | 1           | 1.024119448 | 1.051418812 |
| A-6->D-4    | 1           | 1.057816949 | 1.038010801 |
| A-7->D-4    | 1           | 1           | 1           |
| A-8->D-4    | 1           | 1           | 1           |

|             |             |             |             |
|-------------|-------------|-------------|-------------|
| A-9->D-4    | 1           | 1           | 1           |
| A-10->D-4   | 1           | 1           | 1           |
| A-11->D-4   | 1           | 1.116861338 | 1           |
| A-12->D-4   | 1           | 1           | 1           |
| A-13->D-4   | 1           | 1           | 1           |
| A-14->D-4   | 1           | 1.008723007 | 1.000798929 |
| A-15->D-4   | 1           | 1           | 1.050161323 |
| A-16->D-4   | 1           | 1           | 1.002272726 |
| A-17->D-4   | 1           | 1           | 1           |
| A-18->D-4   | 1           | 1.197013217 | 1           |
| A-19->D-4   | 1           | 1           | 1           |
| A-20->D-4   | 1           | 1           | 1           |
| A-21->D-4   | 1           | 1           | 1           |
| A-22->D-4   | 1           | 1           | 1           |
| A-23->D-4   | 1           | 1           | 1           |
| A-24->D-4   | 1           | 1           | 1           |
| A-25->D-4   | 1           | 1.034021788 | 1           |
| A-26->D-4   | 1           | 0.844640454 | 1           |
| A-27->D-4   | 1.030771177 | 1.020285522 | 1           |
| Age->D-4    | 1           | 0.950698455 | 1           |
| Gender->D-4 | 1           | 0.936829242 | 0.986720084 |
| D-1->D-5    | 1           | 1           | 1.028539315 |
| D-2->D-5    | 1           | 1           | 1           |
| D-3->D-5    | 1.044953473 | 1           | 1           |
| D-4->D-5    | 1.143689674 | 1.072435435 | 1.068677651 |
| D-6->D-5    | 1           | 1.012279033 | 1.079695436 |
| D-7->D-5    | 1           | 1.001926091 | 1           |
| D-8->D-5    | 1           | 1           | 1           |
| D-9->D-5    | 1           | 1           | 1           |
| A-1->D-5    | 1           | 1           | 1           |
| A-2->D-5    | 1.047333243 | 1           | 1           |
| A-3->D-5    | 1           | 1.016000309 | 1           |
| A-4->D-5    | 1           | 1           | 1           |
| A-5->D-5    | 1           | 1.070916885 | 1           |
| A-6->D-5    | 1           | 1.000408564 | 1.011201756 |
| A-7->D-5    | 1           | 1           | 1           |
| A-8->D-5    | 1           | 1           | 1           |
| A-9->D-5    | 1           | 1           | 1           |
| A-10->D-5   | 1           | 1           | 1           |
| A-11->D-5   | 1           | 1.143673845 | 1           |
| A-12->D-5   | 1           | 1           | 1           |
| A-13->D-5   | 1           | 1           | 1           |
| A-14->D-5   | 1           | 1           | 1           |

|             |             |             |             |
|-------------|-------------|-------------|-------------|
| A-15->D-5   | 1           | 1           | 1           |
| A-16->D-5   | 1.013279947 | 1           | 1           |
| A-17->D-5   | 0.971783537 | 1           | 1           |
| A-18->D-5   | 1           | 1           | 1           |
| A-19->D-5   | 1           | 1           | 1           |
| A-20->D-5   | 1           | 1           | 1           |
| A-21->D-5   | 1           | 1           | 1           |
| A-22->D-5   | 1           | 1           | 1           |
| A-23->D-5   | 1           | 1.15074652  | 1           |
| A-24->D-5   | 1           | 1           | 1           |
| A-25->D-5   | 1.02949283  | 1.037487256 | 1           |
| A-26->D-5   | 1           | 1           | 1           |
| A-27->D-5   | 1           | 1           | 1           |
| Age->D-5    | 1           | 1           | 1           |
| Gender->D-5 | 1           | 0.991222041 | 1           |
| D-1->D-6    | 1.043498121 | 1           | 1           |
| D-2->D-6    | 1           | 1.071195116 | 1.09970488  |
| D-3->D-6    | 1.020708097 | 1           | 1           |
| D-4->D-6    | 1.032589641 | 1.013436173 | 1.050615465 |
| D-5->D-6    | 1.026494043 | 1.000962993 | 1           |
| D-7->D-6    | 1.013340906 | 1           | 1           |
| D-8->D-6    | 1           | 1           | 1           |
| D-9->D-6    | 1.090235685 | 1           | 1           |
| A-1->D-6    | 0.99520577  | 1           | 1           |
| A-2->D-6    | 1.019706145 | 1           | 1           |
| A-3->D-6    | 1.015426003 | 1.04592857  | 1           |
| A-4->D-6    | 1           | 1           | 1           |
| A-5->D-6    | 1           | 1           | 0.99689535  |
| A-6->D-6    | 1           | 1           | 1           |
| A-7->D-6    | 1           | 1.068484683 | 1           |
| A-8->D-6    | 1           | 1           | 1           |
| A-9->D-6    | 1           | 1           | 1           |
| A-10->D-6   | 1           | 1.098713848 | 1           |
| A-11->D-6   | 1.017789924 | 1           | 1           |
| A-12->D-6   | 1.047790272 | 1           | 1           |
| A-13->D-6   | 0.93954919  | 1           | 1           |
| A-14->D-6   | 1           | 1           | 1.052233494 |
| A-15->D-6   | 1           | 1           | 1           |
| A-16->D-6   | 1           | 1           | 1           |
| A-17->D-6   | 0.987435098 | 1           | 1           |
| A-18->D-6   | 1           | 1           | 1           |
| A-19->D-6   | 1           | 1           | 1           |
| A-20->D-6   | 1           | 1           | 1           |

|             |             |             |             |
|-------------|-------------|-------------|-------------|
| A-21->D-6   | 0.861505318 | 1           | 1           |
| A-22->D-6   | 0.990892133 | 1           | 1           |
| A-23->D-6   | 1           | 1           | 1           |
| A-24->D-6   | 1.051829767 | 1           | 1           |
| A-25->D-6   | 1           | 1           | 1           |
| A-26->D-6   | 1           | 1           | 1           |
| A-27->D-6   | 1           | 1           | 1.011232911 |
| Age->D-6    | 1.003402286 | 1           | 1           |
| Gender->D-6 | 0.881504663 | 0.981336034 | 1           |
| D-1->D-7    | 1.150334774 | 1           | 1.041020379 |
| D-2->D-7    | 1           | 1           | 1.151814044 |
| D-3->D-7    | 1.079659183 | 1           | 1.070918084 |
| D-4->D-7    | 1.159631538 | 1.042112649 | 1           |
| D-5->D-7    | 1.031226785 | 1           | 1.025678823 |
| D-6->D-7    | 1.041754249 | 1.224479239 | 1.127112425 |
| D-8->D-7    | 1           | 1.071109216 | 1           |
| D-9->D-7    | 1           | 1           | 1           |
| A-1->D-7    | 1           | 1           | 1           |
| A-2->D-7    | 1           | 1           | 1           |
| A-3->D-7    | 1           | 1           | 1           |
| A-4->D-7    | 0.999056948 | 1           | 1           |
| A-5->D-7    | 1           | 1           | 1           |
| A-6->D-7    | 1           | 1.051146619 | 1.02111735  |
| A-7->D-7    | 0.951310546 | 0.979009457 | 1           |
| A-8->D-7    | 1           | 1           | 1           |
| A-9->D-7    | 1           | 1           | 1           |
| A-10->D-7   | 0.993509637 | 1           | 1           |
| A-11->D-7   | 1           | 1           | 1           |
| A-12->D-7   | 1           | 1           | 1           |
| A-13->D-7   | 1           | 1           | 1           |
| A-14->D-7   | 1           | 1           | 1           |
| A-15->D-7   | 1           | 1           | 1           |
| A-16->D-7   | 1           | 1.066156317 | 1.08376797  |
| A-17->D-7   | 1           | 1           | 1           |
| A-18->D-7   | 1           | 1           | 1           |
| A-19->D-7   | 1           | 1           | 1           |
| A-20->D-7   | 1           | 1           | 1           |
| A-21->D-7   | 1.369995174 | 1           | 1           |
| A-22->D-7   | 1           | 1.026807089 | 1.05192713  |
| A-23->D-7   | 1           | 1           | 1           |
| A-24->D-7   | 1           | 1           | 1           |
| A-25->D-7   | 0.989139328 | 1.053349313 | 1           |
| A-26->D-7   | 1           | 0.85339449  | 1.015541167 |

|             |             |             |             |
|-------------|-------------|-------------|-------------|
| A-27->D-7   | 1.001957345 | 1           | 1           |
| Age->D-7    | 1           | 0.961921539 | 1           |
| Gender->D-7 | 0.903113361 | 1           | 0.986211141 |
| D-1->D-8    | 1.045394625 | 1           | 1.090072418 |
| D-2->D-8    | 1           | 1           | 1.030192935 |
| D-3->D-8    | 1.079444055 | 1           | 1.026954949 |
| D-4->D-8    | 1           | 1.018298183 | 1           |
| D-5->D-8    | 1.039852187 | 1           | 1           |
| D-6->D-8    | 1           | 1           | 1.06917012  |
| D-7->D-8    | 1.045874441 | 1           | 1.015901532 |
| D-9->D-8    | 1           | 1           | 1           |
| A-1->D-8    | 1           | 1           | 1.002283638 |
| A-2->D-8    | 1.121293065 | 1           | 1.02272339  |
| A-3->D-8    | 1           | 1           | 1           |
| A-4->D-8    | 0.945984595 | 1           | 1           |
| A-5->D-8    | 1           | 1           | 1           |
| A-6->D-8    | 1           | 1           | 1.016259377 |
| A-7->D-8    | 1           | 1           | 1           |
| A-8->D-8    | 0.972691981 | 1           | 1           |
| A-9->D-8    | 1           | 1           | 1           |
| A-10->D-8   | 1           | 1           | 1           |
| A-11->D-8   | 1           | 1           | 0.955758504 |
| A-12->D-8   | 1           | 1           | 1           |
| A-13->D-8   | 0.998664603 | 1           | 1           |
| A-14->D-8   | 1           | 1           | 1           |
| A-15->D-8   | 1           | 1           | 1           |
| A-16->D-8   | 1           | 1           | 1           |
| A-17->D-8   | 1           | 1           | 1           |
| A-18->D-8   | 1           | 1           | 1           |
| A-19->D-8   | 1           | 1.021621907 | 1           |
| A-20->D-8   | 1           | 1           | 1           |
| A-21->D-8   | 1           | 1           | 1           |
| A-22->D-8   | 1           | 1           | 1.014620232 |
| A-23->D-8   | 1           | 1           | 1           |
| A-24->D-8   | 1           | 1           | 1           |
| A-25->D-8   | 1           | 1           | 1.000044709 |
| A-26->D-8   | 0.997001266 | 1           | 1           |
| A-27->D-8   | 1           | 1.095910497 | 1           |
| Age->D-8    | 1           | 1           | 1           |
| Gender->D-8 | 1           | 1           | 0.927337847 |
| D-1->D-9    | 1.002092963 | 1           | 1           |
| D-2->D-9    | 1           | 1           | 1.028439927 |
| D-3->D-9    | 1           | 1           | 1.004631661 |

|             |             |             |             |
|-------------|-------------|-------------|-------------|
| D-4->D-9    | 1           | 1           | 1           |
| D-5->D-9    | 1.010002344 | 1           | 1           |
| D-6->D-9    | 1           | 1           | 1.008125087 |
| D-7->D-9    | 1           | 1           | 1           |
| D-8->D-9    | 1           | 1           | 1           |
| A-1->D-9    | 1           | 1           | 1           |
| A-2->D-9    | 1           | 1           | 1           |
| A-3->D-9    | 1           | 1           | 1           |
| A-4->D-9    | 1           | 1           | 1           |
| A-5->D-9    | 1           | 1           | 1           |
| A-6->D-9    | 1           | 1           | 1           |
| A-7->D-9    | 1           | 1           | 1           |
| A-8->D-9    | 1           | 1           | 1           |
| A-9->D-9    | 1           | 1           | 1           |
| A-10->D-9   | 1           | 1           | 1           |
| A-11->D-9   | 1           | 1           | 1           |
| A-12->D-9   | 1           | 1           | 1           |
| A-13->D-9   | 1           | 1           | 1           |
| A-14->D-9   | 1           | 1           | 1.013385607 |
| A-15->D-9   | 1           | 1           | 1           |
| A-16->D-9   | 1           | 1           | 1           |
| A-17->D-9   | 1           | 1           | 1           |
| A-18->D-9   | 1           | 1           | 1.04731041  |
| A-19->D-9   | 1           | 1           | 1           |
| A-20->D-9   | 1           | 1           | 1.39160422  |
| A-21->D-9   | 1           | 1           | 1.050689279 |
| A-22->D-9   | 1           | 1           | 1           |
| A-23->D-9   | 1           | 1           | 1           |
| A-24->D-9   | 1           | 1           | 1           |
| A-25->D-9   | 1           | 1           | 1.006004519 |
| A-26->D-9   | 1           | 1           | 1           |
| A-27->D-9   | 1           | 1           | 1.019869483 |
| Age->D-9    | 1           | 1           | 1           |
| Gender->D-9 | 1           | 1           | 1           |
| D-1->A-1    | 1           | 1           | 1           |
| D-2->A-1    | 1           | 1           | 1           |
| D-3->A-1    | 1.046747784 | 1           | 1           |
| D-4->A-1    | 1           | 1.049518987 | 1           |
| D-5->A-1    | 1           | 1           | 1           |
| D-6->A-1    | 1           | 1           | 1           |
| D-7->A-1    | 1           | 1           | 1           |
| D-8->A-1    | 1           | 1           | 1.02942171  |
| D-9->A-1    | 1           | 1           | 1           |

|             |             |             |             |
|-------------|-------------|-------------|-------------|
| A-2->A-1    | 1.172000015 | 1           | 1.100969605 |
| A-3->A-1    | 1           | 1           | 1           |
| A-4->A-1    | 1           | 1.050160614 | 1.067205658 |
| A-5->A-1    | 1           | 1           | 1           |
| A-6->A-1    | 1           | 1           | 1           |
| A-7->A-1    | 1           | 1           | 1           |
| A-8->A-1    | 1           | 1           | 1           |
| A-9->A-1    | 1           | 1           | 1           |
| A-10->A-1   | 1           | 1.047607055 | 1           |
| A-11->A-1   | 1           | 1           | 1           |
| A-12->A-1   | 1           | 1           | 1           |
| A-13->A-1   | 1           | 1           | 1           |
| A-14->A-1   | 1           | 1           | 1.034979828 |
| A-15->A-1   | 1.056570982 | 1.035762596 | 1           |
| A-16->A-1   | 1           | 1.144234522 | 1           |
| A-17->A-1   | 1           | 1           | 1           |
| A-18->A-1   | 1           | 1           | 1           |
| A-19->A-1   | 1           | 1           | 1           |
| A-20->A-1   | 1           | 1           | 1.008074526 |
| A-21->A-1   | 1           | 1           | 1           |
| A-22->A-1   | 1           | 1           | 1           |
| A-23->A-1   | 1           | 1           | 1           |
| A-24->A-1   | 1           | 1           | 1           |
| A-25->A-1   | 1           | 1.006342497 | 1           |
| A-26->A-1   | 1           | 1           | 1           |
| A-27->A-1   | 1           | 1           | 1           |
| Age->A-1    | 1           | 1           | 1           |
| Gender->A-1 | 1           | 1           | 1           |
| D-1->A-2    | 1           | 1.032245832 | 1           |
| D-2->A-2    | 1           | 1           | 1           |
| D-3->A-2    | 1.003421777 | 1           | 1           |
| D-4->A-2    | 1           | 1.004507525 | 1           |
| D-5->A-2    | 1.074326082 | 1           | 1           |
| D-6->A-2    | 1.023906502 | 1           | 1           |
| D-7->A-2    | 1           | 1           | 1           |
| D-8->A-2    | 1           | 1.000027004 | 1           |
| D-9->A-2    | 1           | 1           | 1           |
| A-1->A-2    | 1           | 1           | 1           |
| A-3->A-2    | 1           | 1           | 1           |
| A-4->A-2    | 1           | 1.065929066 | 1           |
| A-5->A-2    | 1           | 1           | 1           |
| A-6->A-2    | 1           | 1           | 1           |
| A-7->A-2    | 1.031397796 | 1           | 1           |

|             |             |             |             |
|-------------|-------------|-------------|-------------|
| A-8->A-2    | 1           | 1           | 1           |
| A-9->A-2    | 1           | 1           | 1           |
| A-10->A-2   | 1           | 1.347332312 | 1           |
| A-11->A-2   | 1           | 1           | 1           |
| A-12->A-2   | 1.033329599 | 1.073113854 | 1           |
| A-13->A-2   | 1           | 1           | 1           |
| A-14->A-2   | 1           | 1           | 1           |
| A-15->A-2   | 1           | 1           | 1.038658198 |
| A-16->A-2   | 1           | 1.034533343 | 1           |
| A-17->A-2   | 1           | 1           | 1           |
| A-18->A-2   | 1           | 1.007563746 | 1           |
| A-19->A-2   | 1           | 1           | 1           |
| A-20->A-2   | 1           | 1           | 1           |
| A-21->A-2   | 1           | 1           | 1           |
| A-22->A-2   | 1           | 1           | 1           |
| A-23->A-2   | 1           | 1.162318257 | 1           |
| A-24->A-2   | 1           | 1           | 1.01808642  |
| A-25->A-2   | 1           | 1.090011749 | 1           |
| A-26->A-2   | 1           | 1           | 1           |
| A-27->A-2   | 1.050922486 | 1           | 1           |
| Age->A-2    | 1           | 1           | 1           |
| Gender->A-2 | 1           | 1           | 1           |
| D-1->A-3    | 1           | 1           | 1           |
| D-2->A-3    | 1           | 1           | 1.08115467  |
| D-3->A-3    | 1.044785398 | 1           | 1           |
| D-4->A-3    | 1           | 1           | 1           |
| D-5->A-3    | 1.001453679 | 1           | 1           |
| D-6->A-3    | 1.068517123 | 1           | 1           |
| D-7->A-3    | 1           | 1           | 1.086719574 |
| D-8->A-3    | 1           | 1           | 1           |
| D-9->A-3    | 1           | 1           | 1           |
| A-1->A-3    | 1           | 1           | 1.04539692  |
| A-2->A-3    | 1.007726674 | 1           | 1.053124956 |
| A-4->A-3    | 1           | 1           | 1           |
| A-5->A-3    | 1           | 1           | 1           |
| A-6->A-3    | 1           | 1           | 1           |
| A-7->A-3    | 1           | 1           | 1           |
| A-8->A-3    | 1           | 1           | 1           |
| A-9->A-3    | 1           | 1.013519342 | 1           |
| A-10->A-3   | 1.092246585 | 1.138350455 | 0.944568745 |
| A-11->A-3   | 1           | 1           | 1.192334166 |
| A-12->A-3   | 1.009540443 | 1           | 1           |
| A-13->A-3   | 1           | 1           | 1.026544624 |



|             |             |             |             |
|-------------|-------------|-------------|-------------|
| A-14->A-3   | 1           | 1           | 1.027558205 |
| A-15->A-3   | 1           | 1           | 1           |
| A-16->A-3   | 1           | 1           | 1           |
| A-17->A-3   | 1           | 1           | 1           |
| A-18->A-3   | 1.07821153  | 1           | 1           |
| A-19->A-3   | 1           | 1           | 1           |
| A-20->A-3   | 1           | 1           | 1           |
| A-21->A-3   | 1           | 1           | 0.953825684 |
| A-22->A-3   | 1           | 1           | 1           |
| A-23->A-3   | 1           | 1           | 1           |
| A-24->A-3   | 1.015284285 | 1           | 1           |
| A-25->A-3   | 1           | 1           | 1.109398968 |
| A-26->A-3   | 1           | 1           | 1           |
| A-27->A-3   | 1           | 1           | 1           |
| Age->A-3    | 1           | 1           | 1.001784378 |
| Gender->A-3 | 1           | 1           | 1           |
| D-1->A-4    | 1           | 1           | 1           |
| D-2->A-4    | 1           | 1           | 1           |
| D-3->A-4    | 1           | 1           | 1           |
| D-4->A-4    | 1           | 1           | 1           |
| D-5->A-4    | 1           | 1           | 1           |
| D-6->A-4    | 1           | 1           | 1           |
| D-7->A-4    | 1           | 1           | 1           |
| D-8->A-4    | 1           | 1.062504951 | 1           |
| D-9->A-4    | 0.953498465 | 1.129741872 | 1           |
| A-1->A-4    | 1           | 1.011621084 | 1           |
| A-2->A-4    | 1.170074724 | 1           | 1           |
| A-3->A-4    | 1           | 1.014609365 | 1           |
| A-5->A-4    | 1.023512052 | 1.014048077 | 1           |
| A-6->A-4    | 1           | 1           | 0.998516454 |
| A-7->A-4    | 1.04962043  | 1           | 1           |
| A-8->A-4    | 0.997341085 | 1           | 1           |
| A-9->A-4    | 1.015680685 | 1.043601044 | 1           |
| A-10->A-4   | 1.055831783 | 1           | 1           |
| A-11->A-4   | 1           | 1           | 1.023905007 |
| A-12->A-4   | 1           | 1           | 0.97893813  |
| A-13->A-4   | 1           | 1           | 1           |
| A-14->A-4   | 1           | 1           | 1           |
| A-15->A-4   | 1           | 1           | 1           |
| A-16->A-4   | 1           | 1           | 1           |
| A-17->A-4   | 1           | 1           | 1           |
| A-18->A-4   | 1           | 1           | 1           |
| A-19->A-4   | 1           | 1           | 1           |

|             |             |             |             |
|-------------|-------------|-------------|-------------|
| A-20->A-4   | 1           | 1           | 1           |
| A-21->A-4   | 1           | 1           | 1           |
| A-22->A-4   | 1           | 1.021722003 | 1           |
| A-23->A-4   | 1           | 1           | 1           |
| A-24->A-4   | 1.05904673  | 1.045666381 | 1           |
| A-25->A-4   | 1           | 1           | 1           |
| A-26->A-4   | 1           | 1           | 1           |
| A-27->A-4   | 1           | 1           | 1           |
| Age->A-4    | 1           | 0.98525935  | 1           |
| Gender->A-4 | 1           | 1           | 1           |
| D-1->A-5    | 1           | 1           | 1           |
| D-2->A-5    | 1           | 1           | 1           |
| D-3->A-5    | 1.083159569 | 1           | 1           |
| D-4->A-5    | 1.045708478 | 1.064671737 | 1           |
| D-5->A-5    | 1.00818498  | 1           | 1.03435385  |
| D-6->A-5    | 1.122907481 | 1           | 1.068065653 |
| D-7->A-5    | 1           | 1           | 1           |
| D-8->A-5    | 1.029470205 | 1           | 1           |
| D-9->A-5    | 1           | 1           | 1           |
| A-1->A-5    | 1           | 1           | 1           |
| A-2->A-5    | 1.047142131 | 1.03374526  | 1           |
| A-3->A-5    | 1           | 1.028087155 | 1           |
| A-4->A-5    | 0.956534591 | 1           | 1           |
| A-6->A-5    | 1           | 1           | 1           |
| A-7->A-5    | 1           | 1           | 1           |
| A-8->A-5    | 1           | 1           | 1           |
| A-9->A-5    | 1           | 1           | 1           |
| A-10->A-5   | 1           | 1           | 1           |
| A-11->A-5   | 0.95335845  | 1           | 1           |
| A-12->A-5   | 1           | 1           | 1           |
| A-13->A-5   | 1           | 1           | 1           |
| A-14->A-5   | 1           | 1           | 1           |
| A-15->A-5   | 1           | 1           | 1           |
| A-16->A-5   | 1           | 1           | 1.040798068 |
| A-17->A-5   | 1           | 1           | 1.124028884 |
| A-18->A-5   | 1           | 1           | 1           |
| A-19->A-5   | 1           | 1           | 1           |
| A-20->A-5   | 1           | 1           | 1.448802988 |
| A-21->A-5   | 1           | 1           | 1           |
| A-22->A-5   | 1           | 1.046993381 | 1           |
| A-23->A-5   | 1           | 1           | 0.98284888  |
| A-24->A-5   | 1           | 1           | 0.731890593 |
| A-25->A-5   | 1           | 1           | 1.055899502 |

|             |             |             |             |
|-------------|-------------|-------------|-------------|
| A-26->A-5   | 0.9651602   | 1           | 1           |
| A-27->A-5   | 1.00674245  | 1.142144947 | 1.08535149  |
| Age->A-5    | 1           | 1           | 1.022876643 |
| Gender->A-5 | 1           | 0.985940702 | 0.967020275 |
| D-1->A-6    | 1           | 1           | 1.002332428 |
| D-2->A-6    | 1.084946314 | 1           | 1           |
| D-3->A-6    | 1.077131289 | 1           | 1           |
| D-4->A-6    | 1.058877488 | 1           | 1.006283604 |
| D-5->A-6    | 1.040690083 | 1.120270263 | 1           |
| D-6->A-6    | 1.155186766 | 1           | 1           |
| D-7->A-6    | 1           | 1           | 1           |
| D-8->A-6    | 1           | 1           | 1           |
| D-9->A-6    | 1           | 1           | 1           |
| A-1->A-6    | 1           | 1           | 1           |
| A-2->A-6    | 1.082338848 | 1           | 1           |
| A-3->A-6    | 1.053220608 | 1           | 1           |
| A-4->A-6    | 1.002551714 | 1           | 1           |
| A-5->A-6    | 1           | 1           | 1           |
| A-7->A-6    | 1.01665733  | 1           | 1           |
| A-8->A-6    | 1           | 1.032234234 | 1           |
| A-9->A-6    | 1           | 1           | 1           |
| A-10->A-6   | 1.03696437  | 1           | 1           |
| A-11->A-6   | 1           | 1           | 1           |
| A-12->A-6   | 1.064174787 | 1           | 1           |
| A-13->A-6   | 1           | 1           | 1           |
| A-14->A-6   | 1.005229099 | 0.989262653 | 1           |
| A-15->A-6   | 1           | 1           | 1           |
| A-16->A-6   | 1           | 1           | 1           |
| A-17->A-6   | 0.983929708 | 1           | 1           |
| A-18->A-6   | 1           | 1           | 1           |
| A-19->A-6   | 1.006665418 | 1           | 1           |
| A-20->A-6   | 1.218503297 | 1           | 1           |
| A-21->A-6   | 1           | 1           | 1           |
| A-22->A-6   | 0.922075414 | 1           | 1           |
| A-23->A-6   | 1           | 1           | 1           |
| A-24->A-6   | 1           | 1           | 1           |
| A-25->A-6   | 1           | 1           | 1           |
| A-26->A-6   | 0.957349043 | 1           | 1           |
| A-27->A-6   | 1           | 1           | 1           |
| Age->A-6    | 1           | 1           | 1           |
| Gender->A-6 | 1           | 1           | 1           |
| D-1->A-7    | 1           | 1           | 1           |
| D-2->A-7    | 1           | 1           | 1.019253295 |

|             |             |             |            |
|-------------|-------------|-------------|------------|
| D-3->A-7    | 1           | 1           | 1          |
| D-4->A-7    | 1           | 1           | 1          |
| D-5->A-7    | 1           | 1           | 1          |
| D-6->A-7    | 1           | 1           | 1          |
| D-7->A-7    | 1           | 1           | 1          |
| D-8->A-7    | 1           | 1           | 1          |
| D-9->A-7    | 1           | 1           | 1          |
| A-1->A-7    | 1           | 1           | 1          |
| A-2->A-7    | 1           | 1           | 1.01776752 |
| A-3->A-7    | 1           | 1           | 1          |
| A-4->A-7    | 1           | 1           | 1          |
| A-5->A-7    | 1           | 1           | 1          |
| A-6->A-7    | 1           | 1.003808289 | 1          |
| A-8->A-7    | 1           | 1           | 1          |
| A-9->A-7    | 1           | 1           | 1          |
| A-10->A-7   | 1           | 1           | 1          |
| A-11->A-7   | 1           | 1           | 1          |
| A-12->A-7   | 1           | 1           | 1          |
| A-13->A-7   | 1.030656203 | 1           | 1          |
| A-14->A-7   | 1           | 1           | 1          |
| A-15->A-7   | 1           | 1           | 1          |
| A-16->A-7   | 1           | 1           | 1          |
| A-17->A-7   | 0.986305007 | 1           | 1          |
| A-18->A-7   | 1           | 1           | 1          |
| A-19->A-7   | 1           | 1.02105054  | 1          |
| A-20->A-7   | 1           | 1           | 1          |
| A-21->A-7   | 1           | 1           | 1          |
| A-22->A-7   | 1           | 1           | 1          |
| A-23->A-7   | 1           | 1           | 1          |
| A-24->A-7   | 1           | 1           | 1          |
| A-25->A-7   | 1           | 1           | 1          |
| A-26->A-7   | 1           | 1           | 1          |
| A-27->A-7   | 1           | 1.020176045 | 1          |
| Age->A-7    | 1           | 1           | 1          |
| Gender->A-7 | 1           | 1           | 1          |
| D-1->A-8    | 1.081361484 | 1.052041248 | 1          |
| D-2->A-8    | 1           | 1           | 1          |
| D-3->A-8    | 1           | 1           | 1          |
| D-4->A-8    | 1.064213004 | 1.025372693 | 1          |
| D-5->A-8    | 1           | 1           | 1          |
| D-6->A-8    | 1           | 1           | 1          |
| D-7->A-8    | 1           | 1.017153817 | 1          |
| D-8->A-8    | 1           | 1           | 1          |

|             |             |             |   |
|-------------|-------------|-------------|---|
| D-9->A-8    | 1           | 1           | 1 |
| A-1->A-8    | 1           | 1.014785369 | 1 |
| A-2->A-8    | 1           | 1.041203209 | 1 |
| A-3->A-8    | 1           | 1           | 1 |
| A-4->A-8    | 1           | 1           | 1 |
| A-5->A-8    | 1           | 1           | 1 |
| A-6->A-8    | 1           | 1           | 1 |
| A-7->A-8    | 1           | 1           | 1 |
| A-9->A-8    | 1           | 1.043015532 | 1 |
| A-10->A-8   | 1           | 1           | 1 |
| A-11->A-8   | 1           | 1           | 1 |
| A-12->A-8   | 1           | 1           | 1 |
| A-13->A-8   | 1           | 0.867287123 | 1 |
| A-14->A-8   | 1           | 1           | 1 |
| A-15->A-8   | 1.136268292 | 1           | 1 |
| A-16->A-8   | 1           | 1           | 1 |
| A-17->A-8   | 1.010141095 | 1           | 1 |
| A-18->A-8   | 1           | 1           | 1 |
| A-19->A-8   | 1           | 1           | 1 |
| A-20->A-8   | 1           | 1           | 1 |
| A-21->A-8   | 1           | 1           | 1 |
| A-22->A-8   | 1           | 1           | 1 |
| A-23->A-8   | 1           | 1.129448528 | 1 |
| A-24->A-8   | 1           | 1           | 1 |
| A-25->A-8   | 1           | 1           | 1 |
| A-26->A-8   | 1           | 1           | 1 |
| A-27->A-8   | 1           | 1           | 1 |
| Age->A-8    | 1           | 1           | 1 |
| Gender->A-8 | 1           | 1           | 1 |
| D-1->A-9    | 1           | 1.059839906 | 1 |
| D-2->A-9    | 1           | 1           | 1 |
| D-3->A-9    | 1.115240279 | 1           | 1 |
| D-4->A-9    | 1.035759814 | 1           | 1 |
| D-5->A-9    | 1           | 1.017636166 | 1 |
| D-6->A-9    | 1           | 1           | 1 |
| D-7->A-9    | 1.077430941 | 1           | 1 |
| D-8->A-9    | 1           | 1           | 1 |
| D-9->A-9    | 1           | 1           | 1 |
| A-1->A-9    | 1.064665026 | 1           | 1 |
| A-2->A-9    | 1.118888956 | 1           | 1 |
| A-3->A-9    | 1           | 1           | 1 |
| A-4->A-9    | 1           | 1.033983231 | 1 |
| A-5->A-9    | 1           | 1           | 1 |

|             |             |           |             |
|-------------|-------------|-----------|-------------|
| A-6->A-9    | 1           | 1         | 1           |
| A-7->A-9    | 1           | 1         | 1.009916026 |
| A-8->A-9    | 1.052989526 | 1         | 1           |
| A-10->A-9   | 1.09253691  | 1         | 1           |
| A-11->A-9   | 1           | 1         | 1           |
| A-12->A-9   | 1.114835557 | 1         | 1           |
| A-13->A-9   | 1           | 1         | 1.016272988 |
| A-14->A-9   | 1           | 1         | 1           |
| A-15->A-9   | 1           | 1         | 1           |
| A-16->A-9   | 1           | 1         | 1           |
| A-17->A-9   | 1           | 1         | 1           |
| A-18->A-9   | 1.088881831 | 1         | 1           |
| A-19->A-9   | 1           | 1         | 1           |
| A-20->A-9   | 1           | 1         | 1           |
| A-21->A-9   | 1           | 1         | 1           |
| A-22->A-9   | 1           | 1         | 1           |
| A-23->A-9   | 1           | 1         | 1           |
| A-24->A-9   | 1.00962928  | 1         | 1.128266255 |
| A-25->A-9   | 1.019943353 | 1         | 1           |
| A-26->A-9   | 1           | 1         | 1           |
| A-27->A-9   | 1           | 1         | 1           |
| Age->A-9    | 1           | 0.9887441 | 1           |
| Gender->A-9 | 1           | 1         | 1           |
| D-1->A-10   | 1           | 1         | 1           |
| D-2->A-10   | 1           | 1         | 1           |
| D-3->A-10   | 1           | 1         | 1           |
| D-4->A-10   | 1           | 1         | 1           |
| D-5->A-10   | 1.008297858 | 1         | 1           |
| D-6->A-10   | 1           | 1         | 1           |
| D-7->A-10   | 1           | 1         | 1           |
| D-8->A-10   | 1           | 1         | 1           |
| D-9->A-10   | 1           | 1         | 1           |
| A-1->A-10   | 1.014238844 | 1         | 1           |
| A-2->A-10   | 1           | 1         | 1           |
| A-3->A-10   | 1           | 1         | 1           |
| A-4->A-10   | 1           | 1         | 1           |
| A-5->A-10   | 1           | 1         | 1           |
| A-6->A-10   | 1           | 1         | 1           |
| A-7->A-10   | 1           | 1         | 1           |
| A-8->A-10   | 1           | 1         | 1           |
| A-9->A-10   | 1           | 1         | 1           |
| A-11->A-10  | 1           | 1         | 1           |
| A-12->A-10  | 1           | 1         | 1           |

|              |   |             |   |
|--------------|---|-------------|---|
| A-13->A-10   | 1 | 1           | 1 |
| A-14->A-10   | 1 | 1           | 1 |
| A-15->A-10   | 1 | 1           | 1 |
| A-16->A-10   | 1 | 1           | 1 |
| A-17->A-10   | 1 | 1           | 1 |
| A-18->A-10   | 1 | 1           | 1 |
| A-19->A-10   | 1 | 1           | 1 |
| A-20->A-10   | 1 | 1           | 1 |
| A-21->A-10   | 1 | 1           | 1 |
| A-22->A-10   | 1 | 1           | 1 |
| A-23->A-10   | 1 | 1           | 1 |
| A-24->A-10   | 1 | 1           | 1 |
| A-25->A-10   | 1 | 1           | 1 |
| A-26->A-10   | 1 | 1           | 1 |
| A-27->A-10   | 1 | 1           | 1 |
| Age->A-10    | 1 | 1           | 1 |
| Gender->A-10 | 1 | 1           | 1 |
| D-1->A-11    | 1 | 1           | 1 |
| D-2->A-11    | 1 | 1           | 1 |
| D-3->A-11    | 1 | 1           | 1 |
| D-4->A-11    | 1 | 1           | 1 |
| D-5->A-11    | 1 | 1           | 1 |
| D-6->A-11    | 1 | 1           | 1 |
| D-7->A-11    | 1 | 1           | 1 |
| D-8->A-11    | 1 | 1           | 1 |
| D-9->A-11    | 1 | 1           | 1 |
| A-1->A-11    | 1 | 1.017365764 | 1 |
| A-2->A-11    | 1 | 1           | 1 |
| A-3->A-11    | 1 | 1.024327188 | 1 |
| A-4->A-11    | 1 | 1           | 1 |
| A-5->A-11    | 1 | 1           | 1 |
| A-6->A-11    | 1 | 1           | 1 |
| A-7->A-11    | 1 | 1           | 1 |
| A-8->A-11    | 1 | 1           | 1 |
| A-9->A-11    | 1 | 1           | 1 |
| A-10->A-11   | 1 | 1           | 1 |
| A-12->A-11   | 1 | 1.010468127 | 1 |
| A-13->A-11   | 1 | 1           | 1 |
| A-14->A-11   | 1 | 1           | 1 |
| A-15->A-11   | 1 | 1           | 1 |
| A-16->A-11   | 1 | 1           | 1 |
| A-17->A-11   | 1 | 1           | 1 |
| A-18->A-11   | 1 | 1           | 1 |

|              |             |             |             |
|--------------|-------------|-------------|-------------|
| A-19->A-11   | 1           | 1           | 1           |
| A-20->A-11   | 1           | 1           | 1           |
| A-21->A-11   | 1           | 1           | 1           |
| A-22->A-11   | 1           | 1           | 1           |
| A-23->A-11   | 1           | 1           | 1           |
| A-24->A-11   | 1           | 0.973598471 | 1           |
| A-25->A-11   | 1           | 1           | 1           |
| A-26->A-11   | 1           | 1           | 1           |
| A-27->A-11   | 1           | 1           | 1           |
| Age->A-11    | 1           | 1           | 1           |
| Gender->A-11 | 1           | 1           | 1           |
| D-1->A-12    | 1           | 1           | 1           |
| D-2->A-12    | 1           | 1           | 1           |
| D-3->A-12    | 1           | 1           | 1           |
| D-4->A-12    | 1           | 1.022150312 | 1           |
| D-5->A-12    | 1           | 1.019469734 | 1           |
| D-6->A-12    | 1           | 1           | 1           |
| D-7->A-12    | 1           | 1           | 1           |
| D-8->A-12    | 1           | 1           | 1           |
| D-9->A-12    | 1           | 1           | 1           |
| A-1->A-12    | 1           | 1           | 1           |
| A-2->A-12    | 1           | 1           | 1           |
| A-3->A-12    | 1           | 1           | 1           |
| A-4->A-12    | 1           | 1           | 1           |
| A-5->A-12    | 1           | 1           | 1           |
| A-6->A-12    | 0.989987561 | 1           | 1.001902751 |
| A-7->A-12    | 0.993759112 | 1           | 1.051059058 |
| A-8->A-12    | 1           | 1           | 1           |
| A-9->A-12    | 1           | 1           | 1           |
| A-10->A-12   | 1           | 1           | 1           |
| A-11->A-12   | 1           | 1.036813752 | 1           |
| A-13->A-12   | 1           | 1           | 1.023918723 |
| A-14->A-12   | 1           | 1           | 1           |
| A-15->A-12   | 1           | 1           | 1           |
| A-16->A-12   | 1           | 1           | 1           |
| A-17->A-12   | 1           | 1           | 1           |
| A-18->A-12   | 1           | 1           | 1.046016156 |
| A-19->A-12   | 1           | 1           | 1           |
| A-20->A-12   | 1           | 1           | 1           |
| A-21->A-12   | 1           | 1           | 1           |
| A-22->A-12   | 1           | 1           | 1           |
| A-23->A-12   | 0.999723123 | 1           | 0.930047907 |
| A-24->A-12   | 1           | 1           | 0.945492098 |



|              |             |             |             |
|--------------|-------------|-------------|-------------|
| A-25->A-12   | 1           | 1           | 1           |
| A-26->A-12   | 1           | 1           | 1           |
| A-27->A-12   | 1.047492736 | 1           | 1           |
| Age->A-12    | 1           | 1           | 1           |
| Gender->A-12 | 1           | 1           | 1           |
| D-1->A-13    | 1           | 1           | 1.026671481 |
| D-2->A-13    | 0.986399562 | 1           | 1           |
| D-3->A-13    | 1           | 1           | 1           |
| D-4->A-13    | 1           | 1.009033043 | 1           |
| D-5->A-13    | 1           | 1           | 1           |
| D-6->A-13    | 1           | 1           | 1           |
| D-7->A-13    | 1           | 1           | 1           |
| D-8->A-13    | 1           | 1           | 1           |
| D-9->A-13    | 1           | 1           | 1           |
| A-1->A-13    | 1           | 1           | 1           |
| A-2->A-13    | 1           | 1           | 1           |
| A-3->A-13    | 1           | 1           | 1           |
| A-4->A-13    | 1           | 1           | 1           |
| A-5->A-13    | 1           | 1           | 1           |
| A-6->A-13    | 1           | 1           | 1           |
| A-7->A-13    | 1           | 1           | 1           |
| A-8->A-13    | 1           | 1           | 1           |
| A-9->A-13    | 1           | 1           | 1           |
| A-10->A-13   | 1.000893321 | 1           | 1           |
| A-11->A-13   | 1           | 1           | 1           |
| A-12->A-13   | 1.053063588 | 1.009253346 | 1.004254962 |
| A-14->A-13   | 1           | 1           | 1           |
| A-15->A-13   | 1           | 1           | 1           |
| A-16->A-13   | 1           | 1           | 1           |
| A-17->A-13   | 1           | 1           | 1           |
| A-18->A-13   | 1           | 1           | 1           |
| A-19->A-13   | 1           | 1           | 1           |
| A-20->A-13   | 1           | 1           | 1           |
| A-21->A-13   | 1           | 1           | 1           |
| A-22->A-13   | 1           | 1           | 1           |
| A-23->A-13   | 1           | 1           | 1           |
| A-24->A-13   | 1           | 1           | 1           |
| A-25->A-13   | 1           | 1           | 1           |
| A-26->A-13   | 1.006135992 | 1           | 1           |
| A-27->A-13   | 1           | 1.051832873 | 1.00179635  |
| Age->A-13    | 1.016367739 | 1           | 1           |
| Gender->A-13 | 1           | 1           | 1           |
| D-1->A-14    | 1           | 1           | 1           |

|              |             |             |             |
|--------------|-------------|-------------|-------------|
| D-2->A-14    | 1           | 1           | 1           |
| D-3->A-14    | 1           | 1           | 1           |
| D-4->A-14    | 1           | 1           | 1           |
| D-5->A-14    | 1           | 1           | 1           |
| D-6->A-14    | 1           | 1           | 1           |
| D-7->A-14    | 1           | 1           | 1           |
| D-8->A-14    | 1           | 1           | 1           |
| D-9->A-14    | 1           | 1           | 1           |
| A-1->A-14    | 1           | 1.053815387 | 1           |
| A-2->A-14    | 1           | 1           | 1           |
| A-3->A-14    | 1           | 1           | 1           |
| A-4->A-14    | 1           | 1           | 1           |
| A-5->A-14    | 1           | 1           | 1           |
| A-6->A-14    | 1           | 1           | 1           |
| A-7->A-14    | 1           | 1.052683296 | 1           |
| A-8->A-14    | 1           | 1           | 1           |
| A-9->A-14    | 1           | 1           | 1           |
| A-10->A-14   | 1           | 1           | 1           |
| A-11->A-14   | 1           | 1.019555233 | 1           |
| A-12->A-14   | 1           | 1           | 1           |
| A-13->A-14   | 1           | 1           | 1           |
| A-15->A-14   | 1           | 1           | 1           |
| A-16->A-14   | 1           | 1           | 1           |
| A-17->A-14   | 1           | 1           | 1           |
| A-18->A-14   | 1           | 1           | 1           |
| A-19->A-14   | 1           | 1           | 1           |
| A-20->A-14   | 1           | 1           | 1.097969446 |
| A-21->A-14   | 1           | 1           | 1           |
| A-22->A-14   | 1           | 1           | 1.015205232 |
| A-23->A-14   | 1           | 1.436589248 | 1           |
| A-24->A-14   | 1           | 1           | 1           |
| A-25->A-14   | 1           | 1.062506788 | 1.001155695 |
| A-26->A-14   | 1           | 1           | 1           |
| A-27->A-14   | 1           | 1           | 1           |
| Age->A-14    | 1           | 0.991569448 | 1           |
| Gender->A-14 | 1           | 1           | 1           |
| D-1->A-15    | 1.043429699 | 1           | 1           |
| D-2->A-15    | 1           | 1           | 1           |
| D-3->A-15    | 1           | 1           | 1           |
| D-4->A-15    | 1           | 1           | 1           |
| D-5->A-15    | 1.023388077 | 1           | 1           |
| D-6->A-15    | 1           | 1           | 1           |
| D-7->A-15    | 1.01075584  | 1           | 1           |

|              |             |             |             |
|--------------|-------------|-------------|-------------|
| D-8->A-15    | 1           | 1           | 1           |
| D-9->A-15    | 1           | 1           | 1           |
| A-1->A-15    | 1           | 1           | 1           |
| A-2->A-15    | 1.006670256 | 1           | 1           |
| A-3->A-15    | 1           | 1           | 1           |
| A-4->A-15    | 1           | 1.020745726 | 1           |
| A-5->A-15    | 1           | 1           | 1           |
| A-6->A-15    | 1           | 1           | 1           |
| A-7->A-15    | 1           | 1           | 1           |
| A-8->A-15    | 1           | 1           | 1           |
| A-9->A-15    | 1.013333252 | 1           | 1           |
| A-10->A-15   | 1           | 1           | 1           |
| A-11->A-15   | 1           | 1.100910515 | 1           |
| A-12->A-15   | 1           | 1           | 1           |
| A-13->A-15   | 1           | 1           | 1           |
| A-14->A-15   | 1           | 1           | 1           |
| A-16->A-15   | 1           | 1           | 1           |
| A-17->A-15   | 1           | 1           | 1           |
| A-18->A-15   | 1           | 1           | 1           |
| A-19->A-15   | 1           | 1           | 1           |
| A-20->A-15   | 1           | 1           | 1           |
| A-21->A-15   | 1           | 1           | 1           |
| A-22->A-15   | 1           | 1           | 1           |
| A-23->A-15   | 1           | 1.275580668 | 1           |
| A-24->A-15   | 1.019614336 | 1           | 1           |
| A-25->A-15   | 1           | 1.045263588 | 1.021209272 |
| A-26->A-15   | 1           | 1           | 1           |
| A-27->A-15   | 1           | 1           | 1.050179921 |
| Age->A-15    | 1           | 1           | 1           |
| Gender->A-15 | 1           | 1           | 1           |
| D-1->A-16    | 1           | 1           | 1           |
| D-2->A-16    | 1           | 1           | 1           |
| D-3->A-16    | 1           | 1           | 1           |
| D-4->A-16    | 1           | 1           | 1           |
| D-5->A-16    | 1           | 1           | 1           |
| D-6->A-16    | 1.005194659 | 1           | 1           |
| D-7->A-16    | 1           | 1.084213465 | 1           |
| D-8->A-16    | 1           | 1           | 1           |
| D-9->A-16    | 1           | 1           | 1           |
| A-1->A-16    | 1           | 1           | 1           |
| A-2->A-16    | 1           | 1           | 1           |
| A-3->A-16    | 1           | 1.016953341 | 1           |
| A-4->A-16    | 1           | 1.018144178 | 1           |

|              |             |             |             |
|--------------|-------------|-------------|-------------|
| A-5->A-16    | 1           | 1.032340127 | 1           |
| A-6->A-16    | 1           | 1           | 1           |
| A-7->A-16    | 1           | 1           | 1           |
| A-8->A-16    | 1           | 1           | 1           |
| A-9->A-16    | 1           | 1           | 1           |
| A-10->A-16   | 1           | 1           | 1           |
| A-11->A-16   | 1.067016465 | 1           | 1           |
| A-12->A-16   | 1           | 1           | 1           |
| A-13->A-16   | 1           | 1           | 1.032101857 |
| A-14->A-16   | 1           | 1           | 1           |
| A-15->A-16   | 1           | 1           | 1.012257906 |
| A-17->A-16   | 1           | 1           | 1.017051226 |
| A-18->A-16   | 1           | 1           | 1           |
| A-19->A-16   | 1           | 1           | 1           |
| A-20->A-16   | 1           | 1           | 1.029873402 |
| A-21->A-16   | 1           | 1           | 1           |
| A-22->A-16   | 1           | 1           | 1           |
| A-23->A-16   | 1           | 1.206889361 | 1           |
| A-24->A-16   | 1           | 2.102886009 | 1           |
| A-25->A-16   | 1           | 1           | 1           |
| A-26->A-16   | 1.013553086 | 1           | 1           |
| A-27->A-16   | 1           | 1           | 1           |
| Age->A-16    | 1           | 1           | 1           |
| Gender->A-16 | 1           | 1           | 1           |
| D-1->A-17    | 1           | 1           | 1           |
| D-2->A-17    | 1           | 1           | 1           |
| D-3->A-17    | 1.000934362 | 1           | 1           |
| D-4->A-17    | 1           | 1           | 1           |
| D-5->A-17    | 1           | 1           | 1           |
| D-6->A-17    | 1.174441543 | 1           | 1           |
| D-7->A-17    | 1           | 1           | 1           |
| D-8->A-17    | 1           | 1           | 1           |
| D-9->A-17    | 1           | 1           | 1           |
| A-1->A-17    | 1           | 1           | 1           |
| A-2->A-17    | 1           | 1           | 1           |
| A-3->A-17    | 1           | 1           | 1           |
| A-4->A-17    | 1           | 1           | 1.017664347 |
| A-5->A-17    | 0.976038897 | 1           | 0.985398809 |
| A-6->A-17    | 0.954446955 | 1           | 1.004612934 |
| A-7->A-17    | 1           | 1.003256845 | 0.983226391 |
| A-8->A-17    | 1           | 1           | 1           |
| A-9->A-17    | 1           | 1           | 1           |
| A-10->A-17   | 1           | 1           | 1           |

|              |             |             |             |
|--------------|-------------|-------------|-------------|
| A-11->A-17   | 1           | 1           | 1           |
| A-12->A-17   | 1.064518926 | 1           | 1           |
| A-13->A-17   | 1           | 1           | 1           |
| A-14->A-17   | 1           | 1           | 1           |
| A-15->A-17   | 1           | 1           | 1           |
| A-16->A-17   | 1.058429439 | 1.131382076 | 1.071375479 |
| A-18->A-17   | 1           | 1           | 1           |
| A-19->A-17   | 0.997358861 | 1           | 1           |
| A-20->A-17   | 1           | 1           | 1.03129946  |
| A-21->A-17   | 1           | 1           | 1           |
| A-22->A-17   | 1           | 1           | 1           |
| A-23->A-17   | 1           | 1           | 1           |
| A-24->A-17   | 1           | 1.611493966 | 1           |
| A-25->A-17   | 1           | 1           | 1           |
| A-26->A-17   | 1           | 1           | 1           |
| A-27->A-17   | 1           | 1           | 1           |
| Age->A-17    | 1           | 1           | 1           |
| Gender->A-17 | 1           | 1           | 1           |
| D-1->A-18    | 1           | 1           | 1           |
| D-2->A-18    | 1           | 1           | 1           |
| D-3->A-18    | 1           | 1           | 1           |
| D-4->A-18    | 1           | 1           | 1           |
| D-5->A-18    | 1           | 1           | 1           |
| D-6->A-18    | 1           | 1           | 1.007950486 |
| D-7->A-18    | 1           | 1           | 1           |
| D-8->A-18    | 1           | 1           | 1           |
| D-9->A-18    | 1           | 1           | 1           |
| A-1->A-18    | 1           | 1           | 1           |
| A-2->A-18    | 1           | 1.035328109 | 1           |
| A-3->A-18    | 1           | 1           | 1           |
| A-4->A-18    | 1           | 1           | 1           |
| A-5->A-18    | 1           | 1           | 1           |
| A-6->A-18    | 1           | 1           | 1           |
| A-7->A-18    | 1           | 1           | 1           |
| A-8->A-18    | 1           | 1           | 1           |
| A-9->A-18    | 1           | 1           | 1           |
| A-10->A-18   | 1           | 1.043259012 | 1           |
| A-11->A-18   | 1           | 1           | 1           |
| A-12->A-18   | 1           | 1           | 1           |
| A-13->A-18   | 1           | 1           | 1           |
| A-14->A-18   | 1           | 1           | 1           |
| A-15->A-18   | 1           | 1           | 1           |
| A-16->A-18   | 1           | 1           | 1           |

|              |             |             |             |
|--------------|-------------|-------------|-------------|
| A-17->A-18   | 1           | 1           | 1           |
| A-19->A-18   | 1           | 1           | 1.011781361 |
| A-20->A-18   | 1           | 1           | 1           |
| A-21->A-18   | 1           | 1           | 1           |
| A-22->A-18   | 1           | 1           | 1           |
| A-23->A-18   | 1           | 1.389506731 | 1           |
| A-24->A-18   | 1           | 1           | 1           |
| A-25->A-18   | 1           | 1           | 1           |
| A-26->A-18   | 1           | 1           | 1           |
| A-27->A-18   | 1           | 1           | 1.009451198 |
| Age->A-18    | 1           | 1           | 1           |
| Gender->A-18 | 1           | 1           | 1           |
| D-1->A-19    | 1           | 1.016512637 | 1           |
| D-2->A-19    | 1           | 1           | 1           |
| D-3->A-19    | 1           | 1           | 1           |
| D-4->A-19    | 1           | 1           | 1           |
| D-5->A-19    | 1           | 1           | 1           |
| D-6->A-19    | 1           | 1           | 1           |
| D-7->A-19    | 1.073608724 | 1           | 1           |
| D-8->A-19    | 1           | 1           | 1           |
| D-9->A-19    | 1.015928002 | 1           | 1           |
| A-1->A-19    | 1           | 1           | 1           |
| A-2->A-19    | 1           | 1           | 1           |
| A-3->A-19    | 1           | 1           | 1           |
| A-4->A-19    | 1.000055683 | 1           | 1           |
| A-5->A-19    | 1           | 1           | 1           |
| A-6->A-19    | 0.985901677 | 1           | 1           |
| A-7->A-19    | 1           | 1.097169361 | 1           |
| A-8->A-19    | 0.978269643 | 1           | 1           |
| A-9->A-19    | 1           | 1.018986686 | 1           |
| A-10->A-19   | 1.046814944 | 1           | 1           |
| A-11->A-19   | 1           | 1           | 1           |
| A-12->A-19   | 1           | 1           | 1           |
| A-13->A-19   | 1           | 1           | 1           |
| A-14->A-19   | 0.981681458 | 1           | 1           |
| A-15->A-19   | 1           | 1           | 1           |
| A-16->A-19   | 1           | 1           | 1           |
| A-17->A-19   | 1           | 1           | 1           |
| A-18->A-19   | 1           | 1.068386746 | 1           |
| A-20->A-19   | 1           | 1           | 1           |
| A-21->A-19   | 1           | 1           | 1           |
| A-22->A-19   | 1           | 1           | 1           |
| A-23->A-19   | 1           | 1           | 1           |

|              |             |             |   |
|--------------|-------------|-------------|---|
| A-24->A-19   | 1           | 1           | 1 |
| A-25->A-19   | 1           | 1           | 1 |
| A-26->A-19   | 1           | 1           | 1 |
| A-27->A-19   | 1.019579967 | 1           | 1 |
| Age->A-19    | 0.98850786  | 0.995236354 | 1 |
| Gender->A-19 | 1           | 0.909062742 | 1 |
| D-1->A-20    | 1           | 1           | 1 |
| D-2->A-20    | 1           | 1           | 1 |
| D-3->A-20    | 1           | 1           | 1 |
| D-4->A-20    | 1           | 1           | 1 |
| D-5->A-20    | 1           | 1           | 1 |
| D-6->A-20    | 1           | 1           | 1 |
| D-7->A-20    | 1           | 1           | 1 |
| D-8->A-20    | 1           | 1           | 1 |
| D-9->A-20    | 1           | 1           | 1 |
| A-1->A-20    | 1           | 1           | 1 |
| A-2->A-20    | 1           | 1           | 1 |
| A-3->A-20    | 1           | 1           | 1 |
| A-4->A-20    | 1           | 1           | 1 |
| A-5->A-20    | 1           | 1           | 1 |
| A-6->A-20    | 1           | 1           | 1 |
| A-7->A-20    | 1           | 1           | 1 |
| A-8->A-20    | 1           | 1           | 1 |
| A-9->A-20    | 1           | 1           | 1 |
| A-10->A-20   | 1           | 1           | 1 |
| A-11->A-20   | 1           | 1           | 1 |
| A-12->A-20   | 1           | 1           | 1 |
| A-13->A-20   | 1           | 1           | 1 |
| A-14->A-20   | 1           | 1           | 1 |
| A-15->A-20   | 1           | 1           | 1 |
| A-16->A-20   | 1           | 1           | 1 |
| A-17->A-20   | 1           | 1           | 1 |
| A-18->A-20   | 1           | 1           | 1 |
| A-19->A-20   | 1           | 1           | 1 |
| A-21->A-20   | 1           | 1           | 1 |
| A-22->A-20   | 1           | 1           | 1 |
| A-23->A-20   | 1           | 1           | 1 |
| A-24->A-20   | 1           | 1           | 1 |
| A-25->A-20   | 1           | 1           | 1 |
| A-26->A-20   | 1           | 1           | 1 |
| A-27->A-20   | 1           | 1           | 1 |
| Age->A-20    | 1           | 1           | 1 |
| Gender->A-20 | 1           | 1           | 1 |

|              |   |             |             |
|--------------|---|-------------|-------------|
| D-1->A-21    | 1 | 1           | 1           |
| D-2->A-21    | 1 | 1           | 1           |
| D-3->A-21    | 1 | 1           | 1           |
| D-4->A-21    | 1 | 1           | 1           |
| D-5->A-21    | 1 | 1           | 1           |
| D-6->A-21    | 1 | 1           | 1           |
| D-7->A-21    | 1 | 1           | 1           |
| D-8->A-21    | 1 | 1           | 1           |
| D-9->A-21    | 1 | 1           | 1           |
| A-1->A-21    | 1 | 1           | 1           |
| A-2->A-21    | 1 | 1           | 1           |
| A-3->A-21    | 1 | 1           | 1           |
| A-4->A-21    | 1 | 1           | 1           |
| A-5->A-21    | 1 | 1           | 1           |
| A-6->A-21    | 1 | 1           | 1           |
| A-7->A-21    | 1 | 1           | 1           |
| A-8->A-21    | 1 | 1           | 1           |
| A-9->A-21    | 1 | 1           | 1           |
| A-10->A-21   | 1 | 1           | 1           |
| A-11->A-21   | 1 | 1           | 1           |
| A-12->A-21   | 1 | 1           | 1           |
| A-13->A-21   | 1 | 1           | 1           |
| A-14->A-21   | 1 | 1           | 1           |
| A-15->A-21   | 1 | 1           | 1           |
| A-16->A-21   | 1 | 1           | 1           |
| A-17->A-21   | 1 | 1           | 1           |
| A-18->A-21   | 1 | 1           | 1           |
| A-19->A-21   | 1 | 1           | 1           |
| A-20->A-21   | 1 | 1           | 1           |
| A-22->A-21   | 1 | 1           | 1           |
| A-23->A-21   | 1 | 1           | 1           |
| A-24->A-21   | 1 | 1           | 1           |
| A-25->A-21   | 1 | 1           | 1           |
| A-26->A-21   | 1 | 1           | 1           |
| A-27->A-21   | 1 | 1           | 1           |
| Age->A-21    | 1 | 1           | 1           |
| Gender->A-21 | 1 | 1           | 1           |
| D-1->A-22    | 1 | 1.033100409 | 1           |
| D-2->A-22    | 1 | 1           | 1           |
| D-3->A-22    | 1 | 1           | 1           |
| D-4->A-22    | 1 | 1           | 1           |
| D-5->A-22    | 1 | 1.034648354 | 1           |
| D-6->A-22    | 1 | 1.034785769 | 1.015637308 |



|              |   |             |             |
|--------------|---|-------------|-------------|
| D-7->A-22    | 1 | 1           | 1           |
| D-8->A-22    | 1 | 1           | 1           |
| D-9->A-22    | 1 | 1           | 1           |
| A-1->A-22    | 1 | 1           | 1           |
| A-2->A-22    | 1 | 1           | 1           |
| A-3->A-22    | 1 | 1           | 1.041212415 |
| A-4->A-22    | 1 | 1           | 1.013775771 |
| A-5->A-22    | 1 | 1           | 1           |
| A-6->A-22    | 1 | 1           | 1           |
| A-7->A-22    | 1 | 1           | 1           |
| A-8->A-22    | 1 | 1           | 1           |
| A-9->A-22    | 1 | 1           | 1           |
| A-10->A-22   | 1 | 1           | 1           |
| A-11->A-22   | 1 | 1.133576882 | 1           |
| A-12->A-22   | 1 | 1           | 1           |
| A-13->A-22   | 1 | 1           | 1           |
| A-14->A-22   | 1 | 1           | 1           |
| A-15->A-22   | 1 | 1           | 1           |
| A-16->A-22   | 1 | 1           | 1           |
| A-17->A-22   | 1 | 1           | 1           |
| A-18->A-22   | 1 | 1           | 1           |
| A-19->A-22   | 1 | 1           | 1           |
| A-20->A-22   | 1 | 1           | 1.195873763 |
| A-21->A-22   | 1 | 1           | 1           |
| A-23->A-22   | 1 | 1           | 1           |
| A-24->A-22   | 1 | 1           | 1           |
| A-25->A-22   | 1 | 1           | 1.007835205 |
| A-26->A-22   | 1 | 1           | 1           |
| A-27->A-22   | 1 | 1           | 1           |
| Age->A-22    | 1 | 1           | 1           |
| Gender->A-22 | 1 | 1           | 1           |
| D-1->A-23    | 1 | 1           | 1           |
| D-2->A-23    | 1 | 1           | 1           |
| D-3->A-23    | 1 | 1           | 1           |
| D-4->A-23    | 1 | 1           | 1           |
| D-5->A-23    | 1 | 1           | 1           |
| D-6->A-23    | 1 | 1           | 1           |
| D-7->A-23    | 1 | 1           | 1           |
| D-8->A-23    | 1 | 1           | 1           |
| D-9->A-23    | 1 | 1           | 1           |
| A-1->A-23    | 1 | 1           | 1           |
| A-2->A-23    | 1 | 1           | 1           |
| A-3->A-23    | 1 | 1           | 1           |

|              |   |   |   |
|--------------|---|---|---|
| A-4->A-23    | 1 | 1 | 1 |
| A-5->A-23    | 1 | 1 | 1 |
| A-6->A-23    | 1 | 1 | 1 |
| A-7->A-23    | 1 | 1 | 1 |
| A-8->A-23    | 1 | 1 | 1 |
| A-9->A-23    | 1 | 1 | 1 |
| A-10->A-23   | 1 | 1 | 1 |
| A-11->A-23   | 1 | 1 | 1 |
| A-12->A-23   | 1 | 1 | 1 |
| A-13->A-23   | 1 | 1 | 1 |
| A-14->A-23   | 1 | 1 | 1 |
| A-15->A-23   | 1 | 1 | 1 |
| A-16->A-23   | 1 | 1 | 1 |
| A-17->A-23   | 1 | 1 | 1 |
| A-18->A-23   | 1 | 1 | 1 |
| A-19->A-23   | 1 | 1 | 1 |
| A-20->A-23   | 1 | 1 | 1 |
| A-21->A-23   | 1 | 1 | 1 |
| A-22->A-23   | 1 | 1 | 1 |
| A-24->A-23   | 1 | 1 | 1 |
| A-25->A-23   | 1 | 1 | 1 |
| A-26->A-23   | 1 | 1 | 1 |
| A-27->A-23   | 1 | 1 | 1 |
| Age->A-23    | 1 | 1 | 1 |
| Gender->A-23 | 1 | 1 | 1 |
| D-1->A-24    | 1 | 1 | 1 |
| D-2->A-24    | 1 | 1 | 1 |
| D-3->A-24    | 1 | 1 | 1 |
| D-4->A-24    | 1 | 1 | 1 |
| D-5->A-24    | 1 | 1 | 1 |
| D-6->A-24    | 1 | 1 | 1 |
| D-7->A-24    | 1 | 1 | 1 |
| D-8->A-24    | 1 | 1 | 1 |
| D-9->A-24    | 1 | 1 | 1 |
| A-1->A-24    | 1 | 1 | 1 |
| A-2->A-24    | 1 | 1 | 1 |
| A-3->A-24    | 1 | 1 | 1 |
| A-4->A-24    | 1 | 1 | 1 |
| A-5->A-24    | 1 | 1 | 1 |
| A-6->A-24    | 1 | 1 | 1 |
| A-7->A-24    | 1 | 1 | 1 |
| A-8->A-24    | 1 | 1 | 1 |
| A-9->A-24    | 1 | 1 | 1 |

|              |             |             |             |
|--------------|-------------|-------------|-------------|
| A-10->A-24   | 1           | 1           | 1           |
| A-11->A-24   | 1           | 1           | 1           |
| A-12->A-24   | 1           | 1           | 1           |
| A-13->A-24   | 1           | 1           | 1           |
| A-14->A-24   | 1           | 1           | 1           |
| A-15->A-24   | 1           | 1           | 1           |
| A-16->A-24   | 1           | 1           | 1           |
| A-17->A-24   | 1           | 1           | 1           |
| A-18->A-24   | 1           | 1           | 1           |
| A-19->A-24   | 1           | 1           | 1           |
| A-20->A-24   | 1           | 1           | 1           |
| A-21->A-24   | 1           | 1           | 1           |
| A-22->A-24   | 1           | 1           | 1           |
| A-23->A-24   | 1           | 1           | 1           |
| A-25->A-24   | 1           | 1           | 1           |
| A-26->A-24   | 1           | 1           | 1           |
| A-27->A-24   | 1           | 1           | 1           |
| Age->A-24    | 1           | 1           | 1           |
| Gender->A-24 | 1           | 1           | 1           |
| D-1->A-25    | 1           | 1           | 1           |
| D-2->A-25    | 1           | 1           | 1           |
| D-3->A-25    | 1           | 1           | 1           |
| D-4->A-25    | 1           | 1           | 1           |
| D-5->A-25    | 1.015600158 | 1.05411607  | 1           |
| D-6->A-25    | 1           | 1           | 1.002135053 |
| D-7->A-25    | 1           | 1           | 1.002667561 |
| D-8->A-25    | 1           | 1           | 1.026653859 |
| D-9->A-25    | 1           | 1           | 1           |
| A-1->A-25    | 1           | 1           | 1           |
| A-2->A-25    | 1           | 1           | 1           |
| A-3->A-25    | 1           | 1           | 1           |
| A-4->A-25    | 1           | 1           | 1.019139627 |
| A-5->A-25    | 1           | 1           | 1           |
| A-6->A-25    | 1           | 1           | 1           |
| A-7->A-25    | 1           | 1.147487273 | 1           |
| A-8->A-25    | 1           | 1           | 1           |
| A-9->A-25    | 1.003592412 | 1           | 1           |
| A-10->A-25   | 1           | 1           | 1           |
| A-11->A-25   | 1           | 1.112739409 | 1           |
| A-12->A-25   | 1.015240188 | 1           | 1           |
| A-13->A-25   | 1           | 1           | 1           |
| A-14->A-25   | 1           | 1           | 1           |
| A-15->A-25   | 1.030476808 | 1           | 1.023827268 |

|              |             |             |             |
|--------------|-------------|-------------|-------------|
| A-16->A-25   | 0.969894152 | 1           | 1.012347537 |
| A-17->A-25   | 1.020360583 | 0.9996256   | 1           |
| A-18->A-25   | 1           | 1           | 1           |
| A-19->A-25   | 1           | 1           | 1           |
| A-20->A-25   | 1           | 1           | 1           |
| A-21->A-25   | 1           | 1           | 1           |
| A-22->A-25   | 1           | 1           | 1           |
| A-23->A-25   | 1           | 1           | 1           |
| A-24->A-25   | 1           | 1.207370986 | 1           |
| A-26->A-25   | 1           | 1           | 1           |
| A-27->A-25   | 1           | 1.012989796 | 1           |
| Age->A-25    | 1           | 1           | 1           |
| Gender->A-25 | 1           | 1           | 1           |
| D-1->A-26    | 1           | 1           | 1           |
| D-2->A-26    | 1           | 1           | 1           |
| D-3->A-26    | 1           | 1           | 1           |
| D-4->A-26    | 1           | 1           | 1           |
| D-5->A-26    | 1           | 1           | 1           |
| D-6->A-26    | 1           | 1           | 1           |
| D-7->A-26    | 1           | 1           | 1           |
| D-8->A-26    | 1           | 1           | 1           |
| D-9->A-26    | 1           | 1           | 1           |
| A-1->A-26    | 1           | 1           | 1           |
| A-2->A-26    | 1           | 1           | 1           |
| A-3->A-26    | 1           | 1           | 1           |
| A-4->A-26    | 1           | 1           | 1           |
| A-5->A-26    | 1           | 1           | 1           |
| A-6->A-26    | 1           | 1           | 1           |
| A-7->A-26    | 1           | 1           | 1           |
| A-8->A-26    | 1           | 1           | 1           |
| A-9->A-26    | 1           | 1           | 1           |
| A-10->A-26   | 1           | 1           | 1           |
| A-11->A-26   | 1           | 1           | 1           |
| A-12->A-26   | 1           | 1           | 1           |
| A-13->A-26   | 1           | 1           | 1           |
| A-14->A-26   | 1           | 1           | 1           |
| A-15->A-26   | 1           | 1           | 1           |
| A-16->A-26   | 1           | 1           | 1           |
| A-17->A-26   | 1           | 1           | 1           |
| A-18->A-26   | 1           | 1           | 1           |
| A-19->A-26   | 1           | 1           | 1           |
| A-20->A-26   | 1           | 1           | 1           |
| A-21->A-26   | 1           | 1           | 1           |

|              |             |             |             |
|--------------|-------------|-------------|-------------|
| A-22->A-26   | 1           | 1           | 1           |
| A-23->A-26   | 1           | 1           | 1           |
| A-24->A-26   | 1           | 1           | 1           |
| A-25->A-26   | 1           | 1           | 1           |
| A-27->A-26   | 1           | 1           | 1           |
| Age->A-26    | 1           | 1           | 1           |
| Gender->A-26 | 1           | 1           | 1           |
| D-1->A-27    | 1           | 1.014441473 | 1           |
| D-2->A-27    | 1           | 1           | 1           |
| D-3->A-27    | 1.056048829 | 1.005869814 | 1           |
| D-4->A-27    | 1           | 1.030920455 | 1           |
| D-5->A-27    | 1           | 1           | 1           |
| D-6->A-27    | 1           | 1.080281432 | 1           |
| D-7->A-27    | 1.106918811 | 1           | 1           |
| D-8->A-27    | 1.043264136 | 1.024556203 | 1           |
| D-9->A-27    | 1           | 1.039262057 | 1           |
| A-1->A-27    | 1           | 1           | 1.024686117 |
| A-2->A-27    | 1           | 1           | 1           |
| A-3->A-27    | 1           | 1.01428327  | 1           |
| A-4->A-27    | 1           | 1           | 1           |
| A-5->A-27    | 1           | 1           | 1           |
| A-6->A-27    | 1           | 0.968044465 | 1           |
| A-7->A-27    | 1           | 1.09926846  | 1           |
| A-8->A-27    | 1           | 1           | 1           |
| A-9->A-27    | 1           | 1           | 1           |
| A-10->A-27   | 1           | 1           | 1           |
| A-11->A-27   | 1           | 1.54511527  | 1           |
| A-12->A-27   | 1           | 1           | 1           |
| A-13->A-27   | 1.010507525 | 1           | 1           |
| A-14->A-27   | 1           | 1           | 1           |
| A-15->A-27   | 1           | 1           | 1           |
| A-16->A-27   | 1           | 1           | 1           |
| A-17->A-27   | 1.007069079 | 1           | 1           |
| A-18->A-27   | 1           | 1           | 1           |
| A-19->A-27   | 1           | 1           | 1           |
| A-20->A-27   | 1           | 1           | 1           |
| A-21->A-27   | 1           | 1           | 1           |
| A-22->A-27   | 1           | 1.078971861 | 1           |
| A-23->A-27   | 1           | 1           | 1           |
| A-24->A-27   | 1           | 1           | 1           |
| A-25->A-27   | 1           | 1           | 1           |
| A-26->A-27   | 1           | 1           | 1           |
| Age->A-27    | 1           | 1           | 1           |

|              |   |             |   |
|--------------|---|-------------|---|
| Gender->A-27 | 1 | 0.947380831 | 1 |
| D-1->Age     | 1 | 1           | 1 |
| D-2->Age     | 1 | 1           | 1 |
| D-3->Age     | 1 | 1           | 1 |
| D-4->Age     | 1 | 1           | 1 |
| D-5->Age     | 1 | 1           | 1 |
| D-6->Age     | 1 | 1           | 1 |
| D-7->Age     | 1 | 1           | 1 |
| D-8->Age     | 1 | 1           | 1 |
| D-9->Age     | 1 | 1           | 1 |
| A-1->Age     | 1 | 1           | 1 |
| A-2->Age     | 1 | 1           | 1 |
| A-3->Age     | 1 | 1           | 1 |
| A-4->Age     | 1 | 1           | 1 |
| A-5->Age     | 1 | 1           | 1 |
| A-6->Age     | 1 | 1           | 1 |
| A-7->Age     | 1 | 1           | 1 |
| A-8->Age     | 1 | 1           | 1 |
| A-9->Age     | 1 | 1           | 1 |
| A-10->Age    | 1 | 1           | 1 |
| A-11->Age    | 1 | 1           | 1 |
| A-12->Age    | 1 | 1           | 1 |
| A-13->Age    | 1 | 1           | 1 |
| A-14->Age    | 1 | 1           | 1 |
| A-15->Age    | 1 | 1           | 1 |
| A-16->Age    | 1 | 1           | 1 |
| A-17->Age    | 1 | 1           | 1 |
| A-18->Age    | 1 | 1           | 1 |
| A-19->Age    | 1 | 1           | 1 |
| A-20->Age    | 1 | 1           | 1 |
| A-21->Age    | 1 | 1           | 1 |
| A-22->Age    | 1 | 1           | 1 |
| A-23->Age    | 1 | 1           | 1 |
| A-24->Age    | 1 | 1           | 1 |
| A-25->Age    | 1 | 1           | 1 |
| A-26->Age    | 1 | 1           | 1 |
| A-27->Age    | 1 | 1           | 1 |
| Gender->Age  | 1 | 1           | 1 |
| D-1->Gender  | 1 | 1           | 1 |
| D-2->Gender  | 1 | 1           | 1 |
| D-3->Gender  | 1 | 1           | 1 |
| D-4->Gender  | 1 | 1           | 1 |
| D-5->Gender  | 1 | 1           | 1 |

|              |   |   |   |
|--------------|---|---|---|
| D-6->Gender  | 1 | 1 | 1 |
| D-7->Gender  | 1 | 1 | 1 |
| D-8->Gender  | 1 | 1 | 1 |
| D-9->Gender  | 1 | 1 | 1 |
| A-1->Gender  | 1 | 1 | 1 |
| A-2->Gender  | 1 | 1 | 1 |
| A-3->Gender  | 1 | 1 | 1 |
| A-4->Gender  | 1 | 1 | 1 |
| A-5->Gender  | 1 | 1 | 1 |
| A-6->Gender  | 1 | 1 | 1 |
| A-7->Gender  | 1 | 1 | 1 |
| A-8->Gender  | 1 | 1 | 1 |
| A-9->Gender  | 1 | 1 | 1 |
| A-10->Gender | 1 | 1 | 1 |
| A-11->Gender | 1 | 1 | 1 |
| A-12->Gender | 1 | 1 | 1 |
| A-13->Gender | 1 | 1 | 1 |
| A-14->Gender | 1 | 1 | 1 |
| A-15->Gender | 1 | 1 | 1 |
| A-16->Gender | 1 | 1 | 1 |
| A-17->Gender | 1 | 1 | 1 |
| A-18->Gender | 1 | 1 | 1 |
| A-19->Gender | 1 | 1 | 1 |
| A-20->Gender | 1 | 1 | 1 |
| A-21->Gender | 1 | 1 | 1 |
| A-22->Gender | 1 | 1 | 1 |
| A-23->Gender | 1 | 1 | 1 |
| A-24->Gender | 1 | 1 | 1 |
| A-25->Gender | 1 | 1 | 1 |
| A-26->Gender | 1 | 1 | 1 |
| A-27->Gender | 1 | 1 | 1 |
| Age->Gender  | 1 | 1 | 1 |
